# Supplementary material for: Physical and Physiological Profiles of Aerobic and Anaerobic Capacities in Young Basketball Players
Source: PubMed Central journal article supplement (PMC7068281; doi:10.3390/ijerph17041409), 2020-02-21
Supplement: ijerph-17-01409-s001.pdf [file ijerph-17-01409-s001.pdf]

**SUPPLEMENTARY MATERIALS**

**Table S1.** Descriptive results of the aerobic test grouped by gender and age.

|        |                                                                | U'14           |         | U'16   |         | U'18   |         |        |
|--------|----------------------------------------------------------------|----------------|---------|--------|---------|--------|---------|--------|
|        |                                                                | Mean           | ST      | Mean   | ST      | Mean   | ST      |        |
| MALE   | Technical-tactical V.                                          | Shots          | 10,40   | 1,150  | 12,12   | 1,10   | 11,81   | 0,87   |
|        |                                                                | Scores         | 3,53    | 1,61   | 5,77    | 2,02   | 5,36    | 2,13   |
|        |                                                                | Efficacy       | 33%     | 14%    | 47%     | 15%    | 45%     | 17%    |
|        | O. E. L. K. V. related to Distance                             | Parts of Circ. | 127,56  | 13,991 | 143,48  | 13,05  | 139,85  | 9,39   |
|        |                                                                | Distance (m)   | 1913,43 | 209,86 | 2152,25 | 195,85 | 2097,72 | 140,86 |
|        | Objective External Load Kinematics V. related to Accelerometry | Acc            | 235,90  | 97,32  | 250,83  | 74,97  | 236,90  | 81,23  |
|        |                                                                | Decel          | 207     | 103,79 | 235,09  | 76,69  | 220,27  | 82,40  |
|        |                                                                | Acc/min        | 19,37   | 8,41   | 20,85   | 6,24   | 19,71   | 6,79   |
|        |                                                                | Decel/min      | 16,96   | 8,89   | 19,54   | 6,38   | 18,34   | 6,87   |
|        | Objective Internal Load V.                                     | HR Med         | 183,28  | 8,75   | 179,03  | 8,71   | 173,48  | 8,71   |
|        |                                                                | HR Max         | 194,43  | 7,07   | 191,96  | 7,57   | 188,21  | 8,85   |
|        |                                                                | HR Rec         | 138,21  | 11,62  | 144,35  | 9,57   | 128,27  | 13,94  |
|        |                                                                | % HR Max       | 91,56   | 4,80   | 89,5    | 4,31   | 86,74   | 4,35   |
|        | Objective External Load Neuromuscular V.                       | Impacts        | 311,31  | 209,07 | 231,03  | 237,60 | 330,63  | 262,90 |
|        |                                                                | PlayerLoad     | 27,57   | 3,491  | 30,96   | 5,25   | 30,81   | 3,38   |
|        |                                                                | PL/min         | 2,29    | 0,28   | 2,57    | 0,44   | 2,48    | 0,28   |
|        |                                                                |                | U'14    | U'16   | U'18    |        |         |        |
|        |                                                                |                | Mean    | ST     | Mean    | ST     | Mean    | ST     |
| FEMALE | Technical-tactical V.                                          | Shots          | 10,12   | 1,20   | 9,42    | 0,75   | 11,23   | 0,75   |
|        |                                                                | Scores         | 2,62    | 1,02   | 3,42    | 0,93   | 4,47    | 2,49   |
|        |                                                                | Efficacy       | 26,1%   | 9,9%   | 37%     | 12%    | 39%     | 21%    |
|        | O. E. L. K. V. related to Distance                             | Parts of Circ. | 125,13  | 16,05  | 113,57  | 8,82   | 131,27  | 9,36   |
|        |                                                                | Distance (m)   | 1876,87 | 240,80 | 1703,57 | 132,30 | 1969,09 | 140,50 |
|        | Objective External Load Kinematics V. related to Accelerometry | Acc            | 263,5   | 76,95  | 364,71  | 84,50  | 401,27  | 46,79  |
|        |                                                                | Decel          | 249,5   | 56,16  | 338,14  | 84,12  | 401,18  | 46,83  |
|        |                                                                | Acc/min        | 22,06   | 6,36   | 30,44   | 6,93   | 33,44   | 3,90   |
|        |                                                                | Decel/min      | 20,89   | 4,64   | 28,23   | 6,91   | 33,42   | 3,90   |
|        | Objective Internal Load V.                                     | HR Med         | 181,62  | 5,08   | 183,14  | 6,35   | 183,77  | 9,62   |
|        |                                                                | HR Max         | 194,5   | 5,86   | 190,14  | 10,71  | 195,7   | 8,51   |
|        |                                                                | HR Rec         | 145,25  | 10,90  | 135     | 5,87   | 133,63  | 13,07  |
|        |                                                                | % HR Max       | 91,41   | 2,53   | 90,92   | 3,17   | 91,56   | 4,80   |
|        | Objective External Load Neuromuscular V.                       | Impacts        | 221,12  | 149,18 | 235,57  | 31,96  | 391,59  | 118,14 |
|        |                                                                | PlayerLoad     | 25,29   | 3,07   | 21,92   | 3,85   | 26,86   | 2,34   |
|        |                                                                | PL/min         | 2,10    | 0,25   | 1,83    | 0,31   | 2,23    | 0,19   |

O. E. L. K. V. related to Distance: Objective External Load Kinematics Variables related to Distance; Parts of Circ: Parts of Circuits; Acc: Accelerations; Decel: Decelerations; HR Med: Heart Rate Medium; HR Max: Heart Rate Maximum; HR Rest: Heart Rate Recovery; PlayerLoad/min: PlayerLoad/minute.

**Table S2.** Descriptive results of the anaerobic test grouped by gender and age.

|        |                                                                | U'14           |        | U'16   |        | U'18   |        |        |
|--------|----------------------------------------------------------------|----------------|--------|--------|--------|--------|--------|--------|
|        |                                                                | Mean           | ST     | Mean   | ST     | Mean   | ST     |        |
| MALE   | Technical-tactical V.                                          | Shots          | 27,44  | 3,48   | 29,56  | 2,86   | 29,43  | 2,49   |
|        |                                                                | Scores         | 18,96  | 5,37   | 26,16  | 3,18   | 25,68  | 4,64   |
|        |                                                                | Efficacy       | 80%    | 16%    | 80%    | 13%    | 81%    | 15%    |
|        | O. E. L. K. V. related to Distance                             | Parts of Circ. | 109,26 | 14,39  | 115,80 | 10,56  | 115,14 | 9,55   |
|        |                                                                | Distance (m)   | 819,44 | 107,92 | 868,50 | 79,17  | 863,57 | 71,59  |
|        | Objective External Load Kinematics V. related to Accelerometry | Acc            | 153,78 | 11,71  | 155,92 | 21,37  | 110,21 | 40,58  |
|        |                                                                | Decel          | 131,30 | 16,33  | 144,00 | 15,11  | 104,93 | 44,48  |
|        |                                                                | Acc/min        | 30,86  | 2,59   | 31,25  | 4,19   | 22,46  | 8,40   |
|        |                                                                | Decel/min      | 26,27  | 3,20   | 28,87  | 3,06   | 21,39  | 9,18   |
|        | Objective Internal Load V.                                     | HR Med         | 181,00 | 7,22   | 173,96 | 13,76  | 167,50 | 8,10   |
|        |                                                                | HR Max         | 198,37 | 6,32   | 190,88 | 11,11  | 185,32 | 7,57   |
|        |                                                                | HR Rec         | 159,63 | 7,80   | 144,68 | 12,79  | 133,00 | 12,98  |
|        |                                                                | % HR Max       | 89,00  | 3,94   | 89,82  | 4,13   | 87,15  | 5,13   |
|        | Objective External Load Neuromuscular V.                       | Impacts        | 189,52 | 49,87  | 246,08 | 126,10 | 296,18 | 120,14 |
|        |                                                                | PlayerLoad     | 16,77  | 4,59   | 17,97  | 6,52   | 14,89  | 3,98   |
|        |                                                                | PL/min         | 3,35   | 0,92   | 3,59   | 1,30   | 2,98   | 0,80   |
|        |                                                                |                | U'14   | U'16   | U'18   |        |        |        |
|        |                                                                |                | Mean   | ST     | Mean   | ST     | Mean   | ST     |
| FEMALE | Technical-tactical V.                                          | Shots          | 29,00  | 1,90   | 27,86  | 2,03   | 29,95  | 1,30   |
|        |                                                                | Scores         | 22,09  | 2,81   | 23,71  | 3,02   | 25,50  | 3,70   |
|        |                                                                | Efficacy       | 87%    | 12%    | 91%    | 9%     | 81%    | 12%    |
|        | O. E. L. K. V. related to Distance                             | Parts of Circ. | 111,09 | 6,87   | 108,57 | 7,44   | 116,20 | 5,05   |
|        |                                                                | Distance (m)   | 833,18 | 51,49  | 814,29 | 55,79  | 871,50 | 37,87  |
|        | Objective External Load Kinematics V. related to Accelerometry | Acc            | 140,91 | 20,79  | 149,29 | 6,14   | 164,30 | 18,54  |
|        |                                                                | Decel          | 134,00 | 13,86  | 148,43 | 6,32   | 161,75 | 20,62  |
|        |                                                                | Acc/min        | 28,14  | 4,18   | 29,54  | 1,40   | 32,86  | 3,71   |
|        |                                                                | Decel/min      | 26,76  | 2,81   | 29,37  | 1,33   | 32,35  | 4,12   |
|        | Objective Internal Load V.                                     | HR Med         | 178,45 | 13,86  | 179,71 | 5,43   | 173,25 | 8,44   |
|        |                                                                | HR Max         | 200,82 | 3,59   | 194,71 | 3,54   | 192,15 | 7,02   |
|        |                                                                | HR Rec         | 142,64 | 12,75  | 153,43 | 8,52   | 133,25 | 12,04  |
|        |                                                                | % HR Max       | 83,93  | 5,73   | 86,86  | 3,99   | 83,10  | 2,45   |
|        | Objective External Load Neuromuscular V.                       | Impacts        | 302,09 | 115,22 | 207,86 | 11,94  | 255,35 | 56,03  |
|        |                                                                | PlayerLoad     | 16,50  | 3,90   | 11,48  | 1,57   | 11,40  | 0,58   |
|        |                                                                | PL/min         | 3,30   | 0,78   | 2,30   | 0,31   | 2,28   | 0,12   |

O. E. L. K. V. related to Distance: Objective External Load Kinematics Variables related to Distance; Parts of Circ: Parts of Circuits; Acc: Accelerations; Decel: Decelerations; HR Med: Heart Rate Medium; HR Max: Heart Rate Maximum; HR Rest: Heart Rate Recovery; PlayerLoad/min: PlayerLoad/ minute.
